1 **The effector protein CgNLP1 of *Colletotrichum gloeosporioides* from *Hevea***  
2 ***brasiliensis* disrupts nuclear localization of necrosis-induced transcription factor**  
3 **HbMYB8-like to suppress plant defense signaling**

4 Guangyong Yang<sup>1,2</sup>, Jie Yang<sup>1,2</sup>, Qiwei Zhang<sup>1,2</sup>, Wenfeng Wang<sup>1</sup>, Liping Feng<sup>1</sup>, Li  
5 Zhao<sup>1</sup>, Bang An<sup>1,2</sup>, Qiannan Wang<sup>1,2</sup>, Chaozu He<sup>1,2</sup>, Hongli Luo<sup>1,2</sup>

6 <sup>1</sup>Hainan Key Laboratory for Sustainable Utilization of Tropical Bioresources, College  
7 of Tropical Corps, Hainan University, Haikou 570228, China; <sup>2</sup>Sanya Nanfan  
8 Research Institute of Hainan University, Hainan Yazhou Bay Seed Laboratory,  
9 Sanya, 572025, China.

10 Author for Correspondence:  
11 *Hongli Luo*  
12 *Tel: +86-13307601272*  
13 *Email: hlluo@hainanu.edu.cn*

|                                                               |      |                                     |                          |
|---------------------------------------------------------------|------|-------------------------------------|--------------------------|
| Total word count (excluding summary, references and legends): | 5284 | No. of figures:                     | 8 (Figs 2-5,7 in colour) |
| Summary:                                                      | 175  | No. of Tables:                      | 0                        |
| Introduction:                                                 | 1078 | No of Supporting Information files: | 7(Figs.S1-S6; Table S1)  |
| Materials and Methods:                                        | 1322 |                                     |                          |
| Results:                                                      | 1521 |                                     |                          |
| Discussion:                                                   | 1174 |                                     |                          |
| Acknowledgements:                                             | 27   |                                     |                          |

14 **Summary**

15 • *Colletotrichum gloeosporioides* is the dominant causal agent of rubber tree  
16 anthracnose and leads to serious loss of natural rubber production. Fungi secrete  
17 numerous effectors to modulate host defense systems. Understanding the molecular  
18 mechanisms by which fungal effectors regulate plant defense is of great importance  
19 for the development of novel strategies for disease control.

20 • Here, we identified an NLP effector gene, *CgNLP1*, which contributed to

21 virulence of *C. gloeosporioides* to rubber tree. Transient expression of CgNLP1 in the  
22 leaves of *Nicotiana benthamiana* induced ethylene production in plants. Ectopic  
23 expression of CgNLP1 in Arabidopsis significantly enhanced the resistance to *Botrytis*  
24 *cinerea* and *A. brassicicola*.

25 • CgNLP1 was shown to target a R2R3 type transcription factor HbMYB8-like  
26 in rubber tree, which localized on nucleus and induced necrosis in *N. benthamiana*.  
27 CgNLP1 disrupted nuclear accumulation of HbMYB8-like and suppressed necrosis  
28 induced by HbMYB8-like mediated SA signal pathway.

29 • This work suggested a strategy whereby *C. gloeosporioides* exploited  
30 CgNLP1 effector to suppress host defense to facilitate infection by disrupting the  
31 subcellular compartment of a host defense regulator HbMYB8-like.

32

33 **Keywords:** *Colletotrichum gloeosporioides*; CgNLP1; pathogenic mechanism; *Hevea*  
34 *brasiliensis*; HbMYB8-like

35

## 36 **Introduction**

37 *Colletotrichum* causes anthracnose on a wide variety of woody plants in tropical,  
38 subtropical and temperate climates (Liang et al., 2021). *C. gloeosporioides* is the  
39 dominant causal agent of rubber tree anthracnose and leads to serious loss of natural  
40 rubber production (Liu et al., 2018). To successfully infect and cause disease,  
41 phytopathogenic fungi need to form intimate associations and maintain constant  
42 communication with a susceptible host, and this communication can be achieved  
43 through the proteins, enzymes and metabolites secreted by phytopathogenic fungi  
44 (Heard et al., 2015). Effector proteins are small cysteine-rich proteins secreted by  
45 pathogens and play roles in virulence and the interaction between plant and pathogens.  
46 According to the innate immunity theory, plants have evolved two strategies to detect  
47 pathogens: one is the recognition of conserved microbial elicitors called pathogen  
48 associated molecular patterns (PAMPs) by receptor proteins called pattern recognition  
49 receptors (PRRs) on the external face of the host cell, which leads to PAMP-triggered

50 immunity (PTI); another one is the recognition of pathogen virulence molecules called  
51 effectors by plant intracellular receptors called R protein, which leads to  
52 effector-triggered immunity (ETI) (Dodds & Rathjen, 2010).

53 The necrosis- and ethylene-inducing protein 1 (Nep1)-like proteins (NLPs) are an  
54 important effector family and named after the necrosis and ethylene-inducing protein  
55 (NEP1) firstly identified from culture filtrate of *Fusarium oxysporum* f.sp. *erythroxyli*  
56 (Bailey, 1995; Chen et al., 2018). NLPs widely distributed in oomycetes, fungi and  
57 bacteria, and shared a conserved necrosis-inducing phytophthora protein (NPP1)  
58 domain, typically containing a GHRHDWE heptapeptide motif which was crucial for  
59 toxicity (Gijzen & Nürnberger, 2006; Lenarčič et al., 2017). Based on the molecular  
60 structures and sequence comparison analysis, NLPs were divided into three  
61 phylogenetic group types: type I, type II and type III (Oome et al., 2014; Levin et  
62 al., 2019; Seidl & Ackerveken, 2019). Type I NLPs contained a conserved disulfide  
63 bond and were found predominately in plant microorganisms. Compared with type I,  
64 type II had a second conserved disulfide bond and an additional putative  
65 calcium-binding domain. Type III NLPs were different from the other types in the  
66 amino acid sequence of N- and C-terminal portion, and there is still very little  
67 experimental data available (Oome et al., 2014; Lenarčič et al., 2017). Based on the  
68 ability to induce necrosis, NLPs were divided into two groups (Schumacher et al.,  
69 2020). Group one was cytotoxic NLP proteins and group two was non-cytotoxic NLP  
70 proteins (Amsellem et al., 2002; Santhanam et al., 2013).

71 The members of group one as their names suggested were best known as a virulence  
72 factor for inducing necrosis and ethylene production in plant leaves (Bailey, 1995;  
73 Oome et al., 2014; Levin et al., 2019; Seidl & Van den Ackerveken, 2019). MoNEP1,  
74 MoNLP2 and MoNEP4, three NLP proteins from the hemibiotrophic plant pathogenic  
75 fungus *Magnaporthe grisea*, induced cell death and the production of reactive oxygen  
76 species in *N. benthamiana* (Fang et al., 2017). BcNEP1 and BcNEP2, two paralogous  
77 NLPs from the necrotrophic plant pathogenic fungus *Botrytis cinerea*, caused necrosis

78 in all dicotyledonous plant species tested (Schouten et al., 2008). Normally, the  
79 cytotoxic NLP proteins were expressed during the switch from biotrophic to  
80 necrotrophic lifestyle in hemibiotrophic pathogens (Alkan et al., 2015). It had been  
81 proved that NLP-induced cell death was an active, light-dependent process that  
82 required HSP90 and interacts with a target site on extracytoplasmic side of dicot plant  
83 plasma membranes (Qutob et al., 2006). Biochemical analyses had revealed that the  
84 target of NLP on plant membrane was sphingolipid-glycosyl inositol phosphorylated  
85 ceramide (GIPC) which consisted of an inositol phosphoceramide and a head group  
86 consisting of glucuronic acid and a variable number and form of terminal hexoses.  
87 When NLPs bind to the head group of GIPC in monocotyledons, the three terminal  
88 hexoses prevented NLPs from inserting into the lipid bilayers of cell membranes,  
89 while the GIPC head of dicotyledons only had two terminal hexoses, allowing NLPs  
90 to insert into cell membranes and causing cell necrosis (Van den Ackerveken, 2017).  
91 Recent research results showed that a plant-derived LRR-only protein NTCD4  
92 promotes NLP-triggered cell death and disease susceptibility by facilitating  
93 oligomerization of NLP in Arabidopsis (Chen et al., 2021).  
94 Group two were non-cytotoxic NLP proteins which were often expressed during very  
95 early stages of the infection or keep at rather low levels during the whole course of  
96 infection (Cabral et al., 2012; Dong et al., 2012; Schumacher et al., 2020). These  
97 non-cytotoxic NLPs also acted as triggers of plant innate immune responses,  
98 including posttranslational activation of mitogen-activated protein kinase activity,  
99 deposition of callose, production of nitric oxide, reactive oxygen intermediates,  
100 ethylene, the phytoalexin camalexin and cell death (Fellbrich et al., 2000; Kanneganti  
101 et al., 2006; Qutob et al., 2006; Rauhut et al., 2009; Villela-Dias et al., 2014; Seidl &  
102 Van den Ackerveken, 2019). Ten different noncytotoxic NLPs (HaNLPs) from  
103 biotrophic downy mildew pathogen *Hyaloperonospora arabidopsidis* did not cause  
104 necrosis, but acted as potent activators of the plant immune system in *Arabidopsis*  
105 *thaliana*, and ectopic expression of HaNLP3 in Arabidopsis enhanced the resistance  
106 to *H. arabidopsidis* and activated the expression of a large set of defense-related  
107 genes (Oome et al., 2014). Moreover, it was also reported that multiple cytotoxic

108 NLPs carried a motif of 20 amino acid residues (nlp20), and nlp20 could trigger PTI  
109 by binding in vivo to a tripartite complex RLP23-SOBIR1-BAK1 (Böhm et al., 2014;  
110 Albert et al., 2015). Ectopic expression of RLP23 in potato (*Solanum tuberosum*)  
111 enhanced immunity to *Phytophthora infestans* and *Sclerotinia sclerotiorum* (Albert et  
112 al., 2015).

113 In *Colletotrichum*, six NLP homologs were identified in the *C. higginsianum* genome.  
114 Of them, ChNLP1 induced cell death when expressed transiently in *Nicotiana*  
115 *benthamiana* and was expressed specifically at the switch from biotrophy to  
116 necrotrophy, whereas ChNLP3 lacks necrosis-inducing activity and was expressed in  
117 appressoria before penetration and (Kleemann et al., 2012). An effector NLP1 from *C.*  
118 *orbiculare* induced necrosis in *N. benthamiana* and also possessed MAMP sequence  
119 called nlp24 which triggered the ROS accumulation in leaf discs of Arabidopsis  
120 (Azmi et al., 2017). In this study, an NLP effector protein identified in *C.*  
121 *gloeosporioides* was named as CgNLP1 which contributed to virulence of *C.*  
122 *gloeosporioides* to rubber tree and enhanced the resistance of Arabidopsis to *B.*  
123 *cinerea*. A R2R3-type transcription factor HbMYB8-like, which localized on nucleus  
124 and induced necrosis, was identified as the target of CgNLP1 in rubber tree, and  
125 CgNLP1 disrupted the nuclear translocation of HbMYB8-like and inhibits  
126 HbMYB8-like-induced cell death mediated by SA signaling. Our results provide new  
127 insights into the molecular mechanisms of interaction between rubber tree and *C.*  
128 *gloeosporioides* mediated by CgNLP1.

129

## 130 **Materials and methods**

### 131 **Biological materials and growth conditions**

132 *Colletotrichum gloeosporioides* strain was isolated from the leaves of *Hevea*  
133 *brasiliensis* with anthracnose. *Botrytis cinerea* and *Alternaria brassicicola* courtesy of  
134 Tesfaye's lab. All fungal strains were grown on potato dextrose agar (PDA) at 28°C in  
135 the dark. *Hevea brasiliensis* (Reyan 7-33-97) was grown on soil at 28°C. *Arabidopsis*  
136 *thaliana* columbia ecotype and *Nicotiana benthamiana* were grown on soil under

137 fluorescent light ( $200 \mu\text{E}\cdot\text{m}^2\cdot\text{s}^{-1}$ ) at  $22^\circ\text{C}$  with 60% RH and a 12-h-light/12-h-dark  
138 cycle.

### 139 **RNA Isolation, cDNA Synthesis, PCR amplification and qRT-PCR**

140 Fungal total RNA was extracted using CTAB-LiCl method (Yang J et al., 2020). Plant  
141 total RNA were extracted according to the instruction of the polysaccharide  
142 polyphenol plant total RNA extraction kit (Tiangen: DP441). The contaminating DNA  
143 was eliminated using RNase-free DNase and the first-strand cDNA was synthesized  
144 using Revert Aid First Strand cDNA Synthesis Kit (Thermo Fisher). Quantitative  
145 RT-PCR analysis was performed using ChamQ Universal SYBR qPCR Master Mix  
146 (Vazyme Biotech: Q711-02) with the LightCycler 96 System (Roche). The *N.*  
147 *tabacum actin-7* (*NtActin 7*) and *H. brasiliensis* 18S rRNA (*Hb18S*) were used as an  
148 endogenous control for normalization. The primers used for quantitative RT-PCR and  
149 PCR amplification were list in Supplemental Table 1. Relative expression levels of  
150 target genes were estimated using the  $2^{-\Delta\Delta\text{Ct}}$  method.

### 151 **Sequence analysis of CgNLP1 and HbMYB8-like**

152 The amino acid sequences were deduced by DNAMAN software. Predictions of  
153 signal peptides were performed online by SignalP 5.0 analysis tool  
154 (<http://www.cbs.dtu.dk/services/SignalP/>). The conserved domains were predicted  
155 using SMART website (<http://smart.embl-heidelberg.de/>). The multiple alignments of  
156 amino acid sequences were performed using ESPript 3.0  
157 (<http://esprict.ibcp.fr/ESPript/cgi-bin/ESPript.cgi>) and GeneDoc 2.7.0. The bootstrap  
158 neighbor-joining phylogenetic tree was constructed using Clustal X 2.0 and MEGA  
159 7.0.

### 160 **Generation of CgNLP1 knockout and complementary mutants**

161 Based on the diagram of *CgNLP1* knockout vector, the 5' and 3' flanking region of  
162 *CgNLP1* were amplified from genomic DNA and ligated into the vector pCB1532  
163 carrying the acetolactate synthase gene (SUR) cassette conferred resistance to  
164 chlorimuron ethyl (a sulfonyleurea herbicide). For the complementation vector, the  
165 open read frame of *CgNLP1* fused with the 3 X FLAG coding sequence was cloned  
166 into the vector harboring the promoter of *ToxA*, the terminator of *nos* and the

167 hygromycin phosphotransferase gene (HPH) (Figure S2a). Fungal transformation was  
168 carried out as described in our previous work (Wang et al., 2018). The mutants were  
169 analyzed by PCR analyses. The primers used for *CgNLP1* amplifying and mutant  
170 diagnosis were list in Supplemental Table 1.

#### 171 **Ethylene production assays**

172 The tobacco leaves transiently expressing *CgNLP1* was collected post *Agrobacterium*  
173 injection every 12 hours for 3 days and kept in sample bottles for 3 days. 0.5 mL of  
174 ethylene released from leaves then was moved to syringe for ethylene contents  
175 assayed using a portable ethylene analyzer (GC-FID 8890, Agilent, USA).  
176 Ethylene standards (99.99% purity) was used for standard curve construction.

#### 177 **Construction of *CgNLP1* overexpression lines in Arabidopsis**

178 The vector pER8-*CgNLP1*-FLAG was constructed with an estradiol-inducible  
179 promoter and then transformed into *Agrobacterium tumefaciens* GV3101.  
180 *Agrobacterium*-mediated flower dip method was used for Arabidopsis transformation  
181 of *CgNLP1*. T1 transgenic lines were screened with 30 mg/L hygromycin and Western  
182 Blot was used to confirm the positive transgenic lines after estradiol treatment.  
183 Appropriate total proteins from different lines were resolved on 10 % polyacrylamide  
184 gels and transferred to a nitrocellulose membrane (Bio-Rad). Anti-FLAG monoclonal  
185 antibody (1:1000, ab125243; Abcam) was used as primary antibody to detect the  
186 expression of *CgNLP1* in transgenic lines. Horseradish peroxidase-conjugated  
187 anti-mouse antibody was used as the secondary antibody, and the signal was detected  
188 using the ECL western detection kit (RPN2232; GE Healthcare).

#### 189 **Disease assays**

190 For the pathogenicity test of *C. gloeosporioides* to rubber tree, Conidia were  
191 harvested from mycelium grown on PDA (potato dextrose agar, Difco) medium for 10  
192 days in a 28°C incubator and resuspended in a solution of PD (potato dextrose broth,  
193 Difco) liquid medium to a final concentration of  $2 \times 10^5$  conidia/mL. Then 10  $\mu$ L of  
194 the conidial suspensions were inoculated onto the wounded rubber tree variety  
195 7-33-97 leaves at “light green” stage. The inoculated leaves were kept in a moist  
196 chamber at 28 °C under natural illumination for 4 days, and the disease symptoms



197 were scored.

198 *B. cinerea* and *A. brassicicola* disease assay were performed on detached leaves by  
199 drop inoculation. Both strains were cultured in 2×V8 solid medium and incubated at  
200 22°C. Conidia of *B. cinerea* were collected and suspended in 1% Sabouraud maltose  
201 broth buffer (Difco) containing 0.05% (v/v) Tween-20 and the conidia density was  
202 adjusted to  $2.5 \times 10^5$  spores/mL before inoculation. Conidia of *A. brassicicola* were  
203 collected and suspended in water containing 0.05% (v/v) Tween-20 and the conidia  
204 density was adjusted to  $5 \times 10^5$  spores/mL before inoculation. In both cases, the  
205 droplets of 5  $\mu$ L spore suspension above were inoculated on 4-week-old Arabidopsis  
206 leaves. The inoculated plants were kept under a transparent cover to maintain high  
207 humidity. The lesion diameters were measured to assess the levels of plant disease  
208 resistance. Each treatment contained three replicates of 9 leaves and the entire  
209 experiment was repeated three times.

#### 210 **Subcellular localization and bimolecular fluorescence complementation (BiFC)** 211 **assays**

212 For Subcellular localization of HbMYB8-like, the coding sequence of *HbMYB8-like*  
213 was inserted into the transient expression vector 35S-MCS-mScarlet to generate  
214 recombinant plasmid HbMYB8-like-RFP. The vector MEIL-RFP was used as marker  
215 vector for plasma membrane and nuclear localization (Guy et al., 2013). For BiFC  
216 assay, the coding sequences of *CgNLP1* and *HbMYB8-like* were inserted into  
217 pSPYCE-YFP<sup>C</sup> and pSPYNE-YFP<sup>N</sup> respectively to generate recombinant plasmids  
218 pSPYCE-*CgNLP1*-YFP<sup>C</sup> and pSPYNE-*HbMYB8-like*-YFP<sup>N</sup>. The above constructs  
219 were verified by sequencing and then introduced into Agrobacterium strain GV3101,  
220 respectively. The Agrobacterium carrying HbMYB-like-RFP was expressed in  
221 *Nicotiana benthamiana* leaf tissue by agroinfiltration for Subcellular localization.  
222 pSPYCE-*CgNLP1*-YFP<sup>C</sup> and pSPYNE-*HbMYB8-like*-YFP<sup>N</sup> was co-expressed in  
223 *Nicotiana benthamiana* leaf tissue for BiFC assay. The fluorescence distribution was  
224 observed with a laser confocal microscope (Leica TCS SP8).

#### 225 **Phytohormones treatment**

226 Seedlings of Reyan7-33-97 were treated with 5 mM salicylic acid (SA), 1 mM methyl



227 jasmonate (MeJA), 0.5 mM ethephon (ET) and placed in 25°C green house (Yang et  
228 al., 2020). After 0, 12, 24, and 48 hours following treating, leaves from seedings were  
229 collected and quickly frozen in liquid nitrogen and then stored in a -80°C refrigerator  
230 for RNA extraction. Two leaves from each seeding were picked and three seedlings  
231 were pooled as one biological replicate. Each seeding was harvested only once.

### 232 **Yeast Two-hybrid Screens**

233 Yeast two-hybrid assays were performed with Matchmaker™ Gold Yeast Two-Hybrid  
234 System according to the manufacturer's instructions (Clotech: No.630489). The  
235 coding sequence of *CgNLP1* was amplified and cloned into pGBKT7 to generate  
236 DNA binding domain bait protein fusion. The cDNA libraries of *Hevea brasiliensis*  
237 was constructed according to the manufacturer's instructions (Clotech: PT4085-1).  
238 Interacting proteins were selected for selective medium lacking His, Leu, Trp and Ade.  
239 The putative interactors were then tested by assaying for the lacZ reporter gene  
240 activation as described in the Clotech protocol. The plasmids from the positive clones  
241 were then isolated and reintroduced into the original yeast bait and control bait strains  
242 to verify interaction.

### 243 **GST Pull-Down Assays**

244 The Prokaryotic expression vectors pCold™ TF-CgNLP1 and pGEX-HbMYB8-like  
245 were constructed and transferred into *E. coli* BL21 (DE3) respectively. The expression  
246 of the fusion proteins was performed as described in the product manuals (Beyotime  
247 Biotechnology: P2262). The cell lysate supernatants containing GST-HbMYB8-like  
248 and His-CgNLP1 fusion protein were incubate with GST binding gels at 4°C for  
249 overnight, and the supernatants containing GST + His-CgNLP1 as the control. The  
250 pull-down reactions were analyzed by SDS-PAGE followed by Western Blot using  
251 anti-His (M20001; Abmart) and anti-GST (ab111947; Abcam) antibodies.

### 252 **Trypan blue staining**

253 Four-week-old tobacco leaves were infiltrated with *Agrobacterium tumefaciens*  
254 GV3101 harboring empty vector pEGAD-eGFP and recombinant plasmid pEGAD-  
255 *CgCPI*-eGFP, respectively. Leaves were harvested 3h after infiltration and stained for  
256 cell death using Trypan Blue Staining Cell Viability Assay Kit (Beyotime Institute of

257 Biotechnology, Haimen, China). For destaining, the leaf samples were boiled in  
258 bleaching solution (ethanol: acetic acid: glycerol=3:1:1) for 15 minutes.

### 259 **Statistical analysis**

260 Statistical analysis was performed with IBM SPSS Statistics v.25. Differences at  $P <$   
261 0.05 were considered as significant.

262

## 263 **Results**

### 264 **CgNLP1 was a type I NLP candidate effector**

265 Based on the genome sequencing of *C. gloeosporioides* from *hevea brasiliensis*, the  
266 genes encoding extracellular secretory protein were predicted and one of them, named  
267 as *CgNLP1*, was amplified by RT-PCR. The open reading frame (ORF) of *CgNLP1*  
268 was 729 bp encoding a protein of 243 aa with two cysteine residues and a signal  
269 peptide (1-18aa) at its N-terminal (Figure S1). The amino acid sequences of *CgNLP1*  
270 were aligned with some NLP proteins identified in fungus, oomycete and bacteria  
271 (Figure 1a). The alignment showed that *CgNLP1* contained a typical NPP1 domain  
272 with a heptapeptide motif SHRHDWE, and had the highest homology with NLP  
273 protein from *verticillium dahliae*. The different types of NLP proteins identified in  
274 fungal species including *CgNLP1* were used to generate a Neighbour joining tree  
275 (Figure 1b). Phylogenetic tree analysis revealed that *CgNLP1* was clustered in the  
276 same branch with other type I NLP proteins. These results suggested that *CgNLP1*  
277 encoded a type I NLP effector protein.

### 278 **CgNLP1 contributed to the virulence of *C. gloeosporioides* to rubber tree**

279 The *CgNLP1* knockout mutant ( $\Delta CgNLP1$ ) was obtained through gene homologous  
280 recombination technology and its complementary strain (Res- $\Delta CgNLP1$ ) was  
281 generated by introducing *CgNLP1* into  $\Delta CgNLP1$  (Figure S2). The detached leaf  
282 inoculation assay of  $\Delta CgNLP1$  and Res- $\Delta CgNLP1$  on rubber tree was performed to  
283 explore the contribution of *CgNLP1* to the pathogenicity of *C. gloeosporioides*.  
284 Results showed that typical necrotic lesions were observed in the leaves inoculated  
285 with WT,  $\Delta CgNLP1$  and Res- $\Delta CgNLP1$  (Figure 2a). At 4 dpi, the lesion size caused

286 by  $\Delta CgNLP1$  was significant smaller than that caused by WT, and there was no  
287 significant difference in the lesion size caused by Res- $\Delta CgNLP1$  compared with the  
288 WT (Figure 2b). These results indicated that the loss of *CgNLP1* resulted in reduced  
289 pathogenicity of *C. gloeosporioides*, suggesting the contribution of *CgNLP1* to the  
290 virulence of *C. gloeosporioides* to rubber tree.

### 291 **CgNLP1 induced ethylene production but not cell death**

292 To determine the necrosis and ethylene inducing ability of *CgNLP1* in plants, tissue  
293 necrosis observation and the ethylene content determination were performed in the  
294 tobacco leaves transiently expressing *CgNLP1* by agroinfiltration. No obvious tissue  
295 necrosis was observed in the infiltration area of tobacco leaves within 3 days post  
296 infiltration and trypan blue staining results showed no obvious difference between the  
297 leaves infiltrated with *A. tumefaciens* GV3101 harboring *CgCPI* gene and empty  
298 vector (Figure S3). The ethylene content in the leaves expressing *CgCPI* was  
299 significantly higher than that in the leaves expressing empty vector (Figure 2c), and  
300 the expression levels of ACO and ACS, two key enzymes of ethylene synthesis, were  
301 significantly higher in leaves expressing NLP than that in control (Figure 2d and 2e).  
302 These data suggested that *CgNLP1* induced ethylene production in plant but not  
303 necrosis and cell death.

### 304 **Ectopic expression of *CgNLP1* enhanced plant disease resistance**

305 *CgNLP1* transgenic Arabidopsis plants driven by estradiol-induced promoter were  
306 generated to explore the roles of *CgNLP1* on plant disease resistance (Figure S4).  
307 We next studied the possible function of *CgNLP1* in resistance against a fungus  
308 pathogen by analyzing disease phenotypes of the different *CgNLP1* lines to *B. cinerea*  
309 and *A. brassicicola* inoculation. Four-week-old plants were challenged with a  
310 normally virulent strain of *B. cinerea* and *A. brassicicola* overexpression of *CgNLP1*  
311 resulted in increased growth of the fungus and enhanced development of disease  
312 symptoms and that disruption of *CgNLP1* led to decreased growth of the fungus and  
313 reduced development of disease symptoms (Figure 3a, 3b and 3c). Therefore, the  
314 Arabidopsis plants overexpressing *CgNLP1* significantly enhanced the resistance to *B.*  
315 *cinerea* and *A. brassicicola*, these results implied that exogenous expression of

316 *CgNLP1* could improve plant disease resistance

317 ***CgNLP1* targeted rubber tree transcription factor *HbMYB8-like***

318 In order to elucidate the pathogenic mechanism of *C. gloeosporioides* on rubber tree,  
319 *CgNLP1*-associated proteins were identified from a cDNA library of rubber tree  
320 leaves by yeast two-hybrid screening using the full-length *CgNLP1* as bait. After  
321 initial screening, 25 positive clones were sequenced and five of them were chosen for  
322 candidates. After verification, it is found that four of them had strong self-activation  
323 and only one of them, named as *HbMYB8-like*, which self-activation could be  
324 inhibited by adding an appropriate concentration of Aba. The *HbMYB8-like* gene was  
325 amplified by RT-PCR and verified by sequencing. The result showed that the  
326 full-length cDNA of *HbMYB8-like* gene was 1183 bp with a 903 bp ORF encoding  
327 300 amino acids. *HbMYB8-like* protein contained two SANT domains which were  
328 typical features of MYB transcription factors. The results of multiple sequence  
329 alignment (Figure S5) and phylogenetic tree (Figure S6) showed that *HbMYB8-like*  
330 protein had typic adjacent repeats R2R3 and clusters with R2R3-MYB type MYB  
331 transcription factors from other plants, suggesting that *HbMYB8-like* belonged to the  
332 R2R3 type MYB transcription factors.

333 The interaction of *CgNLP1* and full length *HbMYB8-like* was preliminarily verified  
334 through yeast two-hybrid (Figure 4a). Then Pull-down and BiFC assay were  
335 performed to further verify the interaction between *CgNLP1* and *HbMYB8-like* in  
336 vitro. In pull down assay, His-tagged *CgNLP1* and GST-tagged *HbMYB8-like* protein  
337 were expressed in *Escherichia coli* BL21 (DE3) respectively. The supernatant  
338 containing GST-tagged *HbMYB8-like* proteins were precipitated using anti-GST  
339 beads after co-incubation with supernatants containing His-tagged *CgNLP1* and His  
340 protein only respectively, and the precipitates were detected using anti-His and  
341 anti-GST antibodies. It was found that only His-tagged *CgNLP1* could be pulled down  
342 by GST-tagged *HbMYB8-like* protein (Figure 4b). In BiFC assay, *CgNLP1* was  
343 translationally fused with the C-terminal portion of YFP (*CgNLP1*-cYFP), and  
344 *HbMYB8-like* was fused with the N-terminal portion of YFP (*HbMYB8-like*-nYFP).

345 CgNLP1-cYFP and HbMYB8-like -nYFP were introduced into *A. tumefaciens* and  
346 co-infiltrated into *N. benthamiana* leaves. Microscopic examination revealed YFP  
347 fluorescence only when the two constructs were co-expressed. Leaves from plants  
348 infiltrated with either of the constructs alone or in combination with the empty vector  
349 showed no fluorescence (Figure 4c). These results demonstrated that CgNLP1  
350 interacted with HbMYB8-like.

### 351 **HbMYB8-like protein localized on nucleus and induced necrosis**

352 HbMYB8-like-RFP fusion protein was transiently expressed in *N. benthamiana* by  
353 agroinfiltration to determine the subcellular localization and explore the function on  
354 defense response. In the leaf tissues expressing only RFP, red fluorescence was  
355 observed throughout the entire cells. However, in the tissues expressing  
356 HbMYB8-like-RFP fusion proteins, red fluorescence was observed only on the  
357 nucleus (Figure 5a). After 2 days post infiltration with *A. tumefaciens* harboring  
358 *HbMYB8-like-RFP* gene, significant necrosis was observed in the infiltration area of  
359 tobacco leaf, while no necrosis was observed on the leaf infiltrated with *A.*  
360 *tumefaciens* harboring only RFP gene (Figure 5b).

### 361 ***HbMYB8-like* responded to fungal phytopathogens and phytohormones in** 362 **rubber tree**

363 To explore the possible roles of *HbMYB8-like* in disease resistance of rubber tree, the  
364 expression profiles of *HbMYB8-like* were investigated in responding to *C.*  
365 *gloeosporioides* and *Erysiphe quercicola* which caused rubber tree anthracnose and  
366 powdery mildew respectively. In the rubber tree leaves inoculated with *C.*  
367 *gloeosporioides* and *E. quercicola*, the expression of *HbMYB8-like* was upregulated  
368 significantly at 24 hr post inoculation (hpi) (Figure 6a-b). In addition, the expression  
369 profiles of *HbMYB8-like* responding to different phytohormones were also  
370 investigated. The results showed that the expression of *HbMYB8-like* was significantly  
371 induced more than 8 times at 12 hours after SA treatment, and was significantly  
372 down-regulated by JA and ET treatments (Figure 6c-e). These results suggested that  
373 *HbMYB8-like* was involved in the resistance to fungal phytopathogens through SA,  
374 JA and ET mediated signaling in rubber tree.

375 **CgNLP1 disrupted the nuclear accumulation of HbMYB8 and inhibited**  
376 **HbMYB8-like induced cell death**

377 We had demonstrated that HbMYB8-like localized on the nucleus as a transcriptional  
378 factor and induced necrosis in tobacco tissues (Figure 6). When we transiently  
379 co-expressed CgNLP1-GFP fusion and nucleo-scytoplasmic marker (MIEL1-RFP) in  
380 *N. benthamiana* leaves, the CgNLP1-GFP completely overlaps with the MIEL1-RFP,  
381 indicating that CgNLP1 was localized on the nucleus and cell membrane. To  
382 determine whether CgNLP1 interfered the subcellular localization of HbMYB8-like,  
383 HbMYB8-like-RFP and CgNLP1-GFP were transiently co-expressed in *N.*  
384 *benthamiana* leaves. Co-expression of HbMYB8-like-RFP with CgNLP1-GFP caused  
385 a distinct change in the localization of HbMYB8-like-RFP in *N. benthamiana* cells.  
386 By itself, HbMYB8-like-RFP was rather uniformly distributed in the nuclei. However,  
387 in the presence of CgNLP1, less HbMYB8-like-RFP was observed in nuclei, and  
388 instead a substantial amount of HbMYB8-like was localized on cell membrane.  
389 CgNLP1-GFP was also detected on the nucleus and cell membrane (Figure 7a). In  
390 addition, we observed that the size of necrosis caused by co-expression of  
391 HbMYB8-like-RFP with CgNLP1-GFP was significant smaller than that caused by  
392 expression of HbMYB8-like-RFP (Figure 7b and 7c). These data suggested that  
393 CgNLP1 could interfere in the nuclear accumulation of HbMYB8-like to inhibit  
394 HbMYB8-like induced necrosis.

395 **CgNLP1 inhibited SA signaling mediated by HbMYB8-like in tobacco leaves**

396 Since CgNLP1 could induce ethylene production in plants and HbMYB8 was  
397 up-regulated in response to exogenous SA (Figure 2c and Figure 6), we examined the  
398 expression patterns of genes related to SA signaling pathway in the tobacco leaves  
399 expressing HbMYB8-like and co-expressing HbMYB8-like and CgNLP1. As showed  
400 in Figure 8, the expression of *NtPR1a*, *NtPR1b*, *NtNPR1* and *NtPAL1* had been  
401 enhanced significantly in the tobacco leaves expressing HbMYB8-like for 24 hours,  
402 but reduced significantly in the tobacco leaves co-expressing HbMYB8-like and  
403 CgNLP1. These results indicated that HbMYB8-like promoted SA signaling and  
404 CgNLP1 repressed SA signaling mediated by HbMYB8-like.

405

## 406 **Discussion**

407 In the 30 years since the first NLP protein was discovered from the culture filtrate of  
408 *Fusarium oxysporum* f.sp. *erythroxyli* (Bailey, 1995), a large number of NLPs had  
409 been identified based on a prominent feature of the NPP1 domain with a conserved  
410 heptapeptide motif GHRHDWE (Oome & Van den Ackerveken, 2014). As mentioned  
411 in the introduction, NLP could be divided into three types, which differed especially  
412 in the number of cysteines. Type I NLPs contained two cysteines forming a conserved  
413 disulfide bond and type II had four cysteines forming two conserved disulfide bond and  
414 an additional putative calcium-binding domain (Oome et al., 2014). In our study,  
415 CgNLP1, an NLP protein identified from *C. gloeosporioides* vs. *hevea brasiliensis*,  
416 contained a NPP1 domain with two cysteine residues (Figure 1a), which conformed to  
417 the structural characteristics of type I NLPs. So, we identified it as type I NLP protein  
418 and it was also supported by phylogenetic analysis (Figure 1b). It had been suggested  
419 that signal peptide at N-terminal, two or four cysteine residues and heptapeptide motif  
420 GHRHDWE were directly related to the necrosis inducing ability of NLPs (Zaparoli  
421 et al., 2011; Lenarčič et al., 2017). When one cysteine was replaced, the NLP protein  
422 from *Phytophthora parasitica*, NPP1, lost necrosis inducing ability (Fellbrich et al.,  
423 2002). Both NLPPp and NLPPs, the NLPs from *P. parasitica* and *P. sojae* respectively,  
424 without signal peptide did not show cytotoxicity when transiently expressed in sugar  
425 beet (Qutob et al., 2006). In conserved heptapeptide motif GHRHDWE of NLP from  
426 *Moniliophthora perniciosa*, the substitution of either at His2 (H) or Asp4 (D) with  
427 alanine substantially abrogated its necrosis inducing activity (Ottmann et al., 2009;  
428 Zaparoli et al., 2011). However, HaNLP3, an NLP protein from *H. arabidopsidis*, did  
429 not induce necrosis on plant cells despite having a conserved heptapeptide motif  
430 (Ottmann et al., 2009; Cabral et al., 2012). In our case, CgNLP1 contained a signal  
431 peptide, two cysteine residues and an SHRHDWE motif with His2 (H) and Asp4 (D),  
432 despite which was different from the typical heptapeptide motif GHRHDWE at the first



433 amino acid site. However, CgNLP1 did not induce obvious necrosis and cell death  
434 when transiently expressed in tobacco leaves (Figure S3), suggested that signal  
435 peptide, the number of cysteine residue and the conserved SHRHDWE motif were not  
436 required for NLPs to induce necrosis and cell death. The mechanism of NLP induced  
437 necrosis requires more researches.

438 NLPs were suggested to play dual roles in plant pathogen interactions as virulence  
439 factors and as triggers of plant innate immune responses (Qutob et al., 2006). The  
440 deletion strains of NLP1 and NLP2 from *Verticillium dahlia* were found to be  
441 significantly less pathogenic on tomato plants (Santhanam et al., 2013). Gene  
442 silencing analysis showed that three NLPs from *P. capsica*, PcNLP2, PcNLP6, and  
443 PcNLP14, contributed positively to virulence on host plants (Feng et al., 2014).  
444 Introduction of Nep1 from *F. oxysporum* into a hypovirulent *Colletotrichum coccodes*  
445 strain dramatically increased its virulence and expanded its host spectrum (Amsellem  
446 et al., 2002). These data showed that some NLPs were required for virulence of  
447 phytopathogens. On the other hand, as described in the introduction part, some NLPs  
448 induced plant innate immune responses resulting in enhanced disease resistance (Seidl  
449 & Van den Ackerveken, 2019). For example, Ectopic expression of HaNLP3 in  
450 Arabidopsis enhanced the resistance to downy mildew (Oome et al., 2014). Our  
451 results showed that the disruption of *CgNLP1* impaired the pathogenicity of *C.*  
452 *gloeosporioides* to rubber tree, and ectopic expression of CgNLP1 in Arabidopsis  
453 enhanced the resistance to *Botrytis cinerea* and *Alternaria brassicicola* (Figures 3),  
454 indicating that *CgNLP1* performed dual functions as both virulence factor and elicitor.  
455 Hormone signaling crosstalk played major roles in plant defense against pathogens  
456 (Derksena, et al., 2013). SA, JA and ET play critical roles in the regulation of  
457 signaling networks of basal resistance against multiple pathogens (Pieterse et al.,  
458 2012). SA signaling positively induces plant defense against biotrophic pathogens,  
459 whereas the JA/ET pathways are required for resistance predominantly against  
460 necrotrophic pathogens and herbivores insects (Yang et al., 2015). We had showed  
461 that CgNLP1 could enhance disease resistance of Arabidopsis to necrotrophic fungi *B.*  
462 *cinerea* and *A. brassicicola* (Figure 3), and had also detected that CgNLP1 promoted

463 ethylene synthesis and accumulation in plant tissues (Figure 2c), indicating that the  
464 disease resistance triggered by CgNLP1 to necrotrophic pathogens may be related to  
465 ethylene accumulation and enhanced ethylene mediated signaling pathway.

466 Fungal effectors were usually secreted and delivered into host plants as pathogenic  
467 factors to shield the fungus, suppress the host immune response, or manipulate host  
468 cell physiology through targeting plant defense components, signaling, and metabolic  
469 pathways to promote host plant colonization (Lo Presti et al., 2015). Plant  
470 transcription factors (TFs) played roles in diverse biological processes including  
471 defense responses to pathogens (Seo & Choi, 2015). Thus, plant transcription factors  
472 are logical targets for effectors, and several studies had demonstrated this. A bacterial  
473 effector AvrRps4 interacted with WRKY transcription factors (Sarris et al., 2015). A  
474 *Phytophthora infestans* effector Pi03192 prevented the translocation of NAC  
475 transcription factors from the endoplasmic reticulum to the nucleus (Hazel et al.,  
476 2013). PpEC23 from *Phakopsora pachyrhizi* targeted transcription factor GmSPL121  
477 to suppress host defense response (Qi et al., 2016). Stripe rust effector PstGSRE1  
478 disrupts nuclear localization of transcription factor TaLOL2 to defeat ROS-induced  
479 defense in wheat (Qi et al., 2019). In our study, CgNLP1 physically interacted with  
480 HbMYB8-like, a R2R3 type MYB transcription factor in rubber tree, which was  
481 localized to the nucleus (Figure 5a). The expression of CgNLP1 in tobacco leaves  
482 induced partial re-localization of HbMYB8-like from nucleus to plasma membrane  
483 and reduced the amount of HbMYB8-like in nuclei (Figure 7a). Logically, it was not  
484 necessary for CgNLP1 to make the long journey from the nucleus to bring  
485 HbMYB8-like back to the plasma membrane if only to inhibit the function of  
486 HbMYB8-like, so it remained to determine the physiological function of  
487 HbMYB8-like re-localization.

488 SA was believed to play important roles in the regulation of programmed cell death or  
489 hypersensitive reaction in plants, a form of plant defense (Radojičić et al., 2018).  
490 According to our data, CgNLP1 contributed to the virulence of *C. gloeosporioides* on  
491 rubber tree (Figure 2a and 2b), and its target in rubber tree, HbMYB8-like, induced  
492 typical necrosis and cell death (Figure 5b), moreover, CgNLP1 repressed cell death

493 induced by HbMYB8-like in tobacco leaves (Figure 7b and 7c). In addition, it also  
494 showed that HbMYB8-like enhanced the expression of genes related to SA signaling  
495 pathway such as *NtPR1a*, *NtPR1b*, *NtNPR1* and *NtPAL1*, which were inhibited  
496 significantly when CgNPL1 co-expressed with HbMYB8-like (Figure 8). Consider  
497 the above data, it looked like that the pathogenicity of CgNLP1 was achieved through  
498 inhibition of defense induced by HbMYB8-like mediated SA signaling.

499 In summary, we identified an important *C. gloeosporioides* effector CgNLP1 which  
500 played dual roles as virulence factor to rubber tree and as a trigger of plant defense  
501 responses, and CgNLP1 blocked nuclear accumulation of rubber tree transcription  
502 factor HbMYB8-like and repressed SA signaling mediated by HbMYB8-like. This  
503 extended our knowledge of novel pathogenic strategy mediated by effector CgNLP1  
504 for *C. gloeosporioides* on rubber tree.

505

#### 506 **Acknowledgements**

507 This study was supported by grants from Hainan Natural Science Foundation (Project  
508 No. 319QN167) and the National Natural Science Foundation of China (Grant Nos.  
509 31860478 and 32060591).

510

#### 511 **References**

512 **Albert I, Böhm H, Albert M, Feiler EC, Imkampe J, Wallmeroth N, Brancato C,**  
513 **Raaymakers MT, Oome S, Zhang H et al. 2015.** An RLP23–SOBIR1–BAK1  
514 complex mediates NLP-triggered immunity. *Nature Plants* **1**:15140.

515 **Alkan N, Friedlander G, Ment D, Prusky D, and Fluhr, R. 2015.** Simultaneous  
516 transcriptome analysis of *Colletotrichum gloeosporioides* and tomato fruit  
517 pathosystem reveals novel fungal pathogenicity and fruit defense strategies. *New*  
518 *Phytologist* **205**: 801-815.

519 **Amsellem Z, Cohen BA, Gressel J. 2002.** Engineering hypervirulence in a  
520 mycoherbicidal fungus for efficient weed control. *Nature Biotechnology*  
521 **20**:1035-1039.

- 522 **Azmi NA, Singkaravanit-Ogawa S, Ikeda K, Kitakura S, Inoue Y, Narusaka Y,**  
523 **Shirasu K, Kaido M, Mise K, Takano Y. 2018.** Inappropriate expression of an  
524 nlp effector in *Colletotrichum orbiculare* impairs infection on *Cucurbitaceae*  
525 *Cultivars* via plant recognition of the c-terminal region. *Molecular Plant-microbe*  
526 *Interactions* **31**: 101-111.
- 527 **Bailey BA. 1995.** Purification of a protein from culture filtrates of *Fusarium*  
528 *oxysporum* that induces ethylene and necrosis in leaves of *Erythroxylum coca*.  
529 *Phytopathology* **85**:1250-1255.
- 530 **Böhm H, Albert I, Oome S, Raaymakers TM, Van den Ackerveken G,**  
531 **Nürnberg T. 2014.** A conserved peptide pattern from a widespread microbial  
532 virulence factor triggers pattern-induced immunity in Arabidopsis. *PLoS*  
533 *Pathogens* **10**: e1004491.
- 534 **Cabral A, Oome S, Sander N, Kuřfner I, Nuřnberger T, Van den Ackerveken G.**  
535 **2012.** Nontoxic Nep1-like proteins of the downy mildew pathogen  
536 *Hyaloperonospora arabidopsidis*: repression of necrosis-inducing activity by a  
537 surface-exposed region. *Molecular Plant-microbe Interactions* **25**: 697-708.
- 538 **Chen J, Bao S, Fang Y, Wei L, Zhu W, Peng Y, Fan J. 2021.** An LRR-only protein  
539 promotes NLP-triggered cell death and disease susceptibility by facilitating  
540 oligomerization of NLP in Arabidopsis. *New Phytologist*. doi:10.1111/nph.17680.
- 541 **Chen X, Huang S, Zhang Y, Gui L, Li Y, Zhu F. 2018.** Identification and functional  
542 analysis of the NLP-encoding genes from the phytopathogenic oomycete  
543 *Phytophthora capsici*. *Molecular Genetics and Genomics* **293**:931-943.
- 544 **Derksena H, Rampitschb C, Daayf F. 2013.** Signaling cross-talk in plant disease  
545 resistance. *Plant Science* **207**: 79-87.
- 546 **Dodds PN, Rathjen JP. 2010.** Plant immunity: towards an integrated view of  
547 plant-pathogen interactions. *Nature Reviews Genetics* **11**: 539-548.
- 548 **Dong S, Kong G, Qutob D, Yu X, Tang J, Kang J, Dai T, Wang H, Gijzen M,**  
549 **Wang Y. 2012.** The NLP toxin family in *Phytophthora sojae* includes rapidly  
550 evolving groups that lack necrosis-inducing activity. *Molecular Plant-microbe*  
551 *Interactions* **25**: 896-909.

- 552 **Seo E, Choi D. 2015.** Functional studies of transcription factors involved in plant  
553 defenses in the genomics era. *Briefings in functional genomics* **14**: 260-267.
- 554 **Fang Y, Peng Y, Fan J. 2017.** The Nep1-like protein family of *Magnaporthe oryzae*  
555 is dispensable for the infection of rice plants. *Scientific Reports* **7**: 4372.
- 556 **Fellbrich G, Blume B, Brunner F, Hirt H, Kroj T, and Ligterink W,**  
557 **Romanski A, Nürnberger T. 2000.** *Phytophthora parasitica* elicitor-induced  
558 reactions in cells of *Petroselinum crispum*. *Plant and Cell Physiology* **41**:  
559 692-701.
- 560 **Fellbrich G, Romanski A, Varet A, Blume B, Brunner F, Engelhardt S, Felix G,**  
561 **Kemmerling B, Krzymowska M, Nürnberger T . 2002.** NPP1, a  
562 *Phytophthora*-associated trigger of plant defense in parsley and Arabidopsis. *The*  
563 *Plant Journal* **32**: 375-390.
- 564 **Feng B, Zhu X, Fu L, Lv R, Storey D, Tooley P, Zhang X. 2014.** Characterization  
565 of necrosis-inducing NLP proteins in *Phytophthora capsici*. *BMC Plant Biology*  
566 **14**:126
- 567 **Gijzen M, Nürnberger T. 2006.** Nep1-like proteins from plant pathogens:  
568 recruitment and diversification of the npp1 domain across taxa. *Phytochemistry*,  
569 **67**(16), 1800-1807.
- 570 **Guy E, Lautier M, Chabannes M, Roux B, Lauber E, Arlat M, Noël LD. 2013.**  
571 XopAC-triggered immunity against xanthomonas depends on arabidopsis  
572 receptor-like cytoplasmic kinase genes *PBL2* and *RIPK*. *Plos One* **8**: e73469.
- 573 **Hazel M, Petra C, Boevink MR, Armstrong LP, Sonia G, Juan M, Stephen CW,**  
574 **Jim LB, Paul RJ, Birch M. 2013.** An RxLR effector from *Phytophthora*  
575 *infestans* prevents re-localisation of two plant NAC transcription factors from the  
576 endoplasmic reticulum to the nucleus. *PLoS Pathogens* **9**: e1003670.
- 577 **Heard S, Brown NA, Hammond-Kosack K. 2015.** An Interspecies comparative  
578 analysis of the predicted secretomes of the necrotrophic plant pathogens  
579 *Sclerotinia sclerotiorum* and *Botrytis cinerea*. *PLoS One* **10**: e0130534.
- 580 **Kanneganti TD, Huitema E, Cakir C, Kamoun S. 2006.** Synergistic interactions of  
581 the plant cell death pathways induced by *Phytophthora infestans* Nep1-like

582 protein PiNPP1.1 and INF1 elicitor. *Molecular Plant-microbe Interactions*  
583 **19**:854–63

584 **Kleemann J, Rincon-Rivera LJ, Takahara H, Neumann U, van Themaat EVL,**  
585 **van der Does HC, Hacquard S, Stüber K, Will I, Schmalenbach W et al.**  
586 **2012.** Sequential delivery of host-induced virulence effectors by appressoria and  
587 intracellular hyphae of the phytopathogen *Colletotrichum higginsianum*. *PLoS*  
588 *Pathogens*. **8**: e1002643.

589 **Lenarčič T, Albert I, Böhm H, Hodnik V, Pirc K, Zavec AB, Podobnik M,**  
590 **Pahovnik D, Žagar E, Pruitt R et al. 2017.** Eudicot plant-specific  
591 sphingolipids determine host selectivity of microbial NLP cytolysins. *Science*  
592 **358**: 1431.

593 **Levin E, Raphael G, Ma J, Ballester AR, Feygenberg O, Norelli J, Aly R,**  
594 **Gonzalez-Candelas L, Wisniewski M, Droby S. 2019.** Identification and  
595 functional analysis of NLP-encoding genes from the postharvest pathogen  
596 *Penicillium expansum*. *Microorganisms* **7**:175.

597 **Liang C, Zhang B, Zhou Y, Yin H, An B, Lin D, He C and Luo H .2021.**CgNPG1  
598 as a novel pathogenic gene of *Colletotrichum gloeosporioides* from *Hevea*  
599 *brasiliensis* in mycelial growth, conidiation, and the invasive structures  
600 development. *Frontiers in Microbiology* **12**:629387.

601 **Liu X, Li B, Cai J, Zheng X, Feng Y, and Huang G. 2018.** *Colletotrichum* species  
602 causing anthracnose of rubber trees in china. *Scientific Reports* **8**:10435.

603 **Lo Presti L, Lanver D, Schweizer G, Tanaka S, Liang L, Tollot M, Zuccaro A,**  
604 **Reissmann S, Kahmann R. 2015.** Fungal effectors and plant susceptibility.  
605 *Annual Review of Plant Biology* **66**:513-545.

606 **Oome S, Van den Ackerveken G. 2014.** Comparative and functional analysis of the  
607 widely occurring family of Nep1-like proteins. *Molecular Plant-Microbe*  
608 *Interactions* **27**:1081-1094.

609 **Oome S, Raaymakers TM, Cabral A, Samwel S, Bohm H, Albertc I, Nürnbergerc**  
610 **T, Van den Ackervekena G. 2014.** Nep1-like proteins from three kingdoms of

611 life act as a microbe-associated molecular pattern in Arabidopsis. *PNAS*  
612 **111**:16955–60.

613 **Ottmann C, Luberacki B, Kufner I, Koch W, Brunner F, Weyand M, Mattinend**  
614 **L, Pirhonend M, Anderluhe G, Seitz HU et al. 2009.** A common toxin fold  
615 mediates microbial attack and plant defense. *Proceedings of the National*  
616 *Academy of Sciences* **106**: 10359-10364.

617 **Pieterse CM, Van der Does D, Zamioudis C, Leon-Reyes A, Van Wees SC. 2012.**  
618 Hormonal modulation of plant immunity. *Annual Review of Cell and*  
619 *Developmental Biology* **28**: 489-521.

620 **Qi MS, Link TI, Müller M, Hirschburger D, Pudake RN, Pedley KF, Braun E,**  
621 **Voegelé RT, Baum TJ, Whitham SA. 2012.** A small cysteine-rich protein from  
622 the Asian soybean rust fungus, *Phakopsora pachyrhizi*, suppresses plant  
623 immunity. *PLoS Pathogens* **12**: e1005827.

624 **Qi T, Guo J, Liu P, He F, Wan C, Islam MA, Tyler BM, Kang Z, and Guo J. 2019.**  
625 Stripe rust effector PstGSRE1 disrupts nuclear localization of ROS-promoting  
626 transcription factor TaLOL2 to defeat ROS-induced defense in wheat. *Molecular*  
627 *Plant* **12**: 1624-1638.

628 **Qutob D, Kemmerling B, Brunner F, Kufner I, Engelhardt S, Gust AA,**  
629 **Luberacki B, Seitz HU, Stahl D, Rauhut T et al. 2006.** Phytotoxicity and  
630 innate immune responses induced by Nep1-like proteins. *The Plant Cell* **18**:  
631 3721-374.

632 **Radojčić A, Li X, Zhang Y. 2018.** Salicylic acid: a double-edged sword for  
633 programmed cell death in plants. *Frontiers in Plant Science* **9**:1133.

634 **Rauhut T, Luberacki B, Seitz HU, Glawischnig E. 2009.** Inducible expression of a  
635 Nep1-like protein serves as a model trigger system of camalexin biosynthesis.  
636 *Phytochemistry* **70**:185-189.

637 **Santhanam P, van Esse HP, Albert I, Faino L, Nürnberger T, Thomma BP. 2013.**  
638 Evidence for functional diversification within a fungal NEP1-like protein family.  
639 *Molecular Plant-Microbe Interactions* **26**: 278-286.



- 640 **Sarris PF, Duxbury Z, UnHuh S, Ma Y, Segonzac C, Sklenar J, Derbyshire P,**  
641 **Cevik V, Rallapalli G, Saucet, SB *et al.* 2015.** A plant immune receptor detects  
642 pathogen effectors that target WRKY transcription factors. *Cell* **161**: 1089-1100.
- 643 **Schouten A, Baarlen PV, and Kan J. 2008.** Phytotoxic Nep1-like proteins from the  
644 necrotrophic fungus *Botrytis cinerea* associate with membranes and the nucleus  
645 of plant cells. *New Phytologist* **177**: 493-505.
- 646 **Schumacher S, Grosser K, Voegele RT, Kassemeyer H-H, Fuchs R. 2020.**  
647 Identification and characterization of Nep1-like proteins from the grapevine  
648 downy mildew pathogen *Plasmopara viticola*. *Frontiers in Plant Science* **11**:65.
- 649 **Seidl MF, Ackerveken G. 2019.** Activity and phylogenetics of the broadly occurring  
650 family of microbial Nep1-like proteins. *Annual Review of Phytopathology*  
651 **57**:1-20.
- 652 **Van den Ackerveken G. 2017.** How plants differ in toxin-sensitivity. *Science*  
653 **358**:1383-1384.
- 654 **Villela-Dias C, Camillo LR, de Oliveira GA, Sena JA, Santiago AS, de Sousa S,**  
655 **Mendesa JS, Pirovania CP, Alvima F C, Costa MGC. 2014.** Nep1-like protein  
656 from *Moniliophthora perniciosa* induces a rapid proteome and metabolome  
657 reprogramming in cells of *Nicotiana benthamiana*. *Physiologia Plantarum*  
658 **150**:1-17
- 659 **Wang Q, An B, Hou X, Guo Y, Luo H and He C. 2017.** Dicer-like proteins regulate  
660 the growth, conidiation, and pathogenicity of *Colletotrichum gloeosporioides*  
661 from *hevea brasiliensis*. *Frontiers in Microbiology* **8**: 2621.
- 662 **Yang Y, Ahammed JG, Wu C, Fan S, Zhou Y. 2015.** Crosstalk among Jasmonate,  
663 Salicylate and Ethylene Signaling Pathways in Plant Disease and Immune  
664 Responses. *Current Protein and Peptide Science* **16**: 450-461.
- 665 **Yang J, Wang Q, Luo H, He, C, An B. 2020.** HbWRKY40 plays an important role in  
666 the regulation of pathogen resistance in *Hevea brasiliensis*. *Plant Cell Reports*  
667 **39**:1095-1107.
- 668 **Zaparoli G, Barsottini MR, de Oliveira JF, Dyszy F, Teixeira PJ, Barau JG,**  
669 **Garcia O, Costa-Filho AJ, Ambrosio AL, Pereira GA *et al.* 2011.** The crystal

670 structure of necrosis- and ethylene-inducing protein 2 from the causal agent of  
671 cacao's witches' broom disease reveals key elements for its activity. *Biochemistry*  
672 **50**: 9901-9910.

673

#### 674 **Figure legends**

675 **Fig. 1** Multiple sequence alignment and Phylogenetic analysis of CgNLP1. (a)  
676 Alignment of the NLP proteins from different microorganism. Shading indicated  
677 regions of conservation in all (black), the same amino acid as CgNLP1 (grey) of  
678 sequences. NLPs used for alignment are from *Fusarium oxysporum* (AAC97382.1),  
679 *Pythium aphanidermatum* (AAD53944.1), *Phytophthora infestans* (AAK25828.1),  
680 *Phytophthora parasitica* (AAK19753.1), *Phytophthora sojae* (AAK01636.1),  
681 *Streptomyces coelicolor* A3(2) (CAB92890.1), *Alkalihalobacillus halodurans* C-125  
682 (BAB04114.1) and *Vibrio pommerensis* (CAC40975.1). (b) Phylogenetic tree of  
683 CgNLP1 with different type of NLPs in fungi. VdNLP1 and VdNLP3 are from  
684 *Verticillium dahlia*, DserNEP3 is from *Diplodia seriata*, FoNEP-like is from  
685 *Fusarium oxysporum*, BcNEP1 and BcNEP2 are from *Botrytis cinerea*, DserNEP2 is  
686 from *Diplodia seriata*, PcNPP1 is from *Phytophthora cinnamomi*, MoNLP2 and  
687 MoNLP3 are from *Pyricularia oryzae*, VdNLP4, VdNLP7, VdNLP8 and VdNLP9 are  
688 from *Verticillium dahlia*.

689 **Fig. 2** CgNLP1 contributed to the virulence of *C. gloeosporioides* to rubber tree and  
690 induced ethylene production in plants. (a) Disease Symptoms on rubber tree leaves at  
691 4 days post inoculated with conidia of  $\Delta$ CgNLP1, Res- $\Delta$ CgNLP1 and WT. (b) Statistic  
692 analysis of lesion diameter after inoculation with WT,  $\Delta$ CgNLP1 and Res- $\Delta$ CgNLP1.  
693 (c) The ethylene content in tobacco leaves expressing CgNLP1. pEGAD represented  
694 the tobacco leaves expressing empty vector pEGAD and pEGAD-CgNLP1  
695 represented the tobacco leaves expressing constructive vector pEGAD-CgNLP1. (d)  
696 The expression pattern of *NtACO1* (LOC107781126) in tobacco leaves expressing  
697 CgNLP1. (e) The expression pattern of *NtACSI* (LOC107831434) in tobacco leaves  
698 expressing CgNLP1 at different time points. Data are shown as the means  $\pm$  SD from  
699 three independent experiments and columns with different letters indicate significant

700 difference ( $P < 0.05$ ).

701 **Fig. 3** Overexpression of *CgNLP1* in Arabidopsis enhanced the resistance to *B.*  
702 *cinerea* and *A. brassicicola*. (a) Disease Symptoms on Arabidopsis lines  
703 overexpressing *CgNLP1* (*CgNLP1*-OE) and wild type (Col-0) at 3 days post  
704 inoculated with *B. cinerea* and *A. brassicicola*, respectively. (b) Statistic analysis of  
705 lesion diameter on *CgNLP1*-OE and *Col-0* after inoculation with *B. cinerea* and *A.*  
706 *brassicicola*. Data are shown as the means  $\pm$  SD from three independent experiments  
707 and columns with different letters indicate significant difference ( $P < 0.05$ ).

708 **Fig. 4** Screening and verification of the interaction between *CgNLP1* and  
709 HbMYB8-like. (a) Verification of the interaction between *CgNLP1* and  
710 HbMYB8-like by yeast two-hybrid assay. AD indicates pGADT7, BD indicates  
711 pGBKT7, pGADT7-T + pGBKT7-53 indicates a positive control, and  
712 pGBKT7-Lam+pGADT7-T indicates the negative control. SD/-Leu/-Trp/X- $\alpha$ -gal  
713 indicates the medium with X- $\alpha$ -gal, but lacking Leu and Trp.  
714 SD/-Ade/-His/-Leu/-Trp/Xa-gal/Aba indicates the medium with X- $\alpha$ -gal and Aba, but  
715 lacking Ade, His, Leu and Trp.  $10^{-1}$ ,  $10^{-2}$ ,  $10^{-3}$ ,  $10^{-4}$ ,  $10^{-5}$ , and  $10^{-6}$  respectively refer to  
716 the yeast suspension with the initial OD value of 2.0 being diluted in a 10-fold  
717 gradient. (b) Verification of the interaction between *CgNLP1* and HbMYB8-like by  
718 GST pull-down assay. His and GST stand for pCold<sup>TM</sup> TF and pGEX respectively.  
719 Arrows indicate GST- and His-tagged proteins. (c) Verification of the interaction  
720 between *CgNLP1* and HbMYB8-like by bimolecular fluorescence complementation  
721 (BiFC) assay. cYFP+nYFP, *CgNLP1*-cYFP+nYFP, cYFP+*HbMYB8-like*-nYFP were  
722 used as a negative control. Scale bar  $\square = \square 25\mu\text{m}$ .

723 **Fig. 5** HbMYB8-like localized on nucleus and induced necrotic cell death. (a)  
724 Subcellular localization of HbMYB8-like protein in tobacco leaves. (b) Cellular  
725 necrosis induced by HbMYB8-like in tobacco leaves. Leaves were photographed  
726 under UV illumination (right) and normal light (left).

727 **Fig. 6** Expression profiles of *HbMYB8-like* in rubber tree the leaves with  
728 phathomycete inoculation and phytohormones treatments. Data are shown as the  
729 means  $\pm$  SD from three independent experiments and columns with different letters

730 indicate significant difference ( $P < 0.05$ ).

731 **Fig.7** CgNLP1 repressed nuclear accumulation of HbMYB8-like and inhibited  
732 necrosis induced by HbMYB8-like. (a) CgNLP1 repressed nuclear accumulation of  
733 HbMYB8-like. Scale bar  $\square = \square 25\mu\text{m}$ . (b) CgNLP1 inhibited necrosis induced by  
734 HbMYB8-like. (c) Statistical analysis of necrosis diameter in tobacco leaves. Data are  
735 shown as the means  $\pm$  SD from three independent experiments and columns with  
736 different letters indicate significant difference ( $P < 0.05$ ).

737 **Fig. 8** Expression patterns of genes related to SA signaling pathway in the tobacco  
738 leaves expressing HbMYB8-like and co-expressing HbMYB8-like and CgNLP1. Data  
739 are shown as the means  $\pm$  SD from three independent experiments.

740

#### 741 **Supporting Information**

742 Additional supporting information may be found in the online version of this article.

743 **Fig. S1** Nucleotide sequence and deduced amino acid sequence of *CgNLP1*. Shading  
744 indicates the amino acid sequences of signal peptide.

745 **Fig. S2** Generation and molecular confirmation of *CgNLP1* deletion mutant  
746 ( $\Delta CgNLP1$ ) and complementation mutant (Res- $\Delta CgNLP1$ ). (a) The diagram of  
747 *CgNLP1* knockout vector. (b) Diagnostic PCR analysis for deletion of *CgNLP1* and  
748 integration of *CgNLP1* into the genome of *C. gloeosporioides*. (c) The expression  
749 level of *CgNLP1* in WT,  $\Delta CgNLP1$  and Res- $\Delta CgNLP1$  by quantitative RT-PCR.

750 **Fig. S3** Trypan blue transient of tobacco leaves expressing *CgNLP1*. pEGAD  
751 indicates the tissue expressing empty vector pEGAD-eGFP, pEGAD-CgNLP1  
752 indicates the tissue expressing recombinant vector pEGAD-CgNLP1-eGFP.

753 **Fig. S4** Identification of *CgNLP1* transgenic Arabidopsis lines by Western blot. Col-0  
754 indicated Arabidopsis Columbia-0 and 1-6 indicated different CgNLP1-OE transgenic  
755 lines under Col-0 background.

756 **Fig. S5** Alignment of HbMYB8-like and homologs from different plants. Shading  
757 indicated regions of conservation in all (black), the same amino acid as HbMYB8-like  
758 (grey) of sequences. The protein sequences used for alignment are: *Arabidopsis*  
759 *thaliana* AtMYB6 (EFH48703.1), *Arabidopsis thaliana* AtMYB8 (Q9SDS8.1), *Oryza*

760 *sativa* OsMYB30 (Q6K1S6.1), *Gossypium hirsutum* GhMYB1 (NP\_001313761.1),

761 *Triticum aestivum* TaRIM1 (AMP18876.1).

762 **Fig S6** Phylogenetic tree of HbMYB8-like with different types of MYB proteins in  
763 plants.

764 **Table S1** The primers used for PCR amplification quantitative and RT-PCR.



(a)

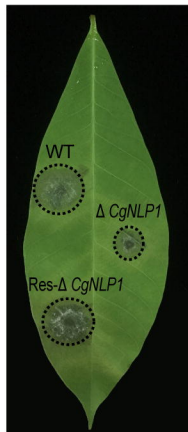

(b)

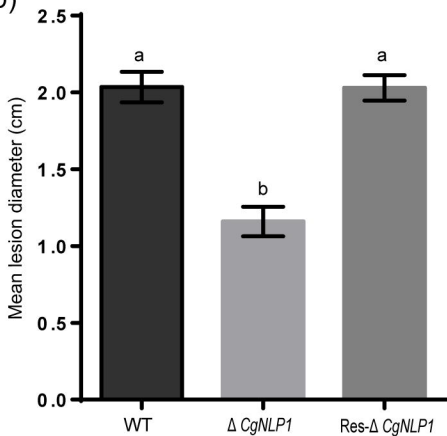

(c)

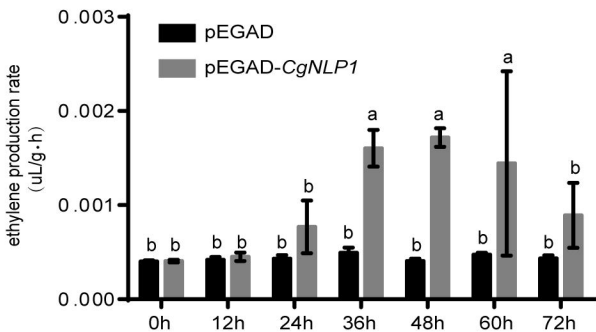

(d)

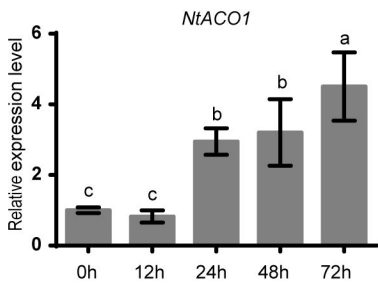

(e)

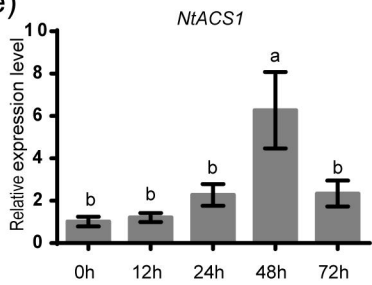



**(a)***B. cinerea**A. brassicicola*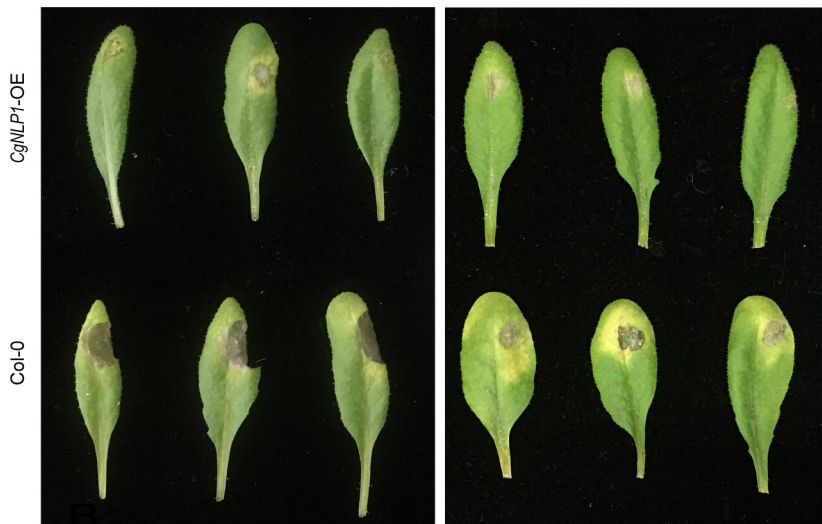**(b)***B. cinerea* inoculation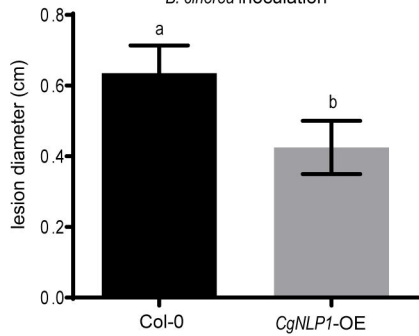**(c)***A. brassicicola* inoculation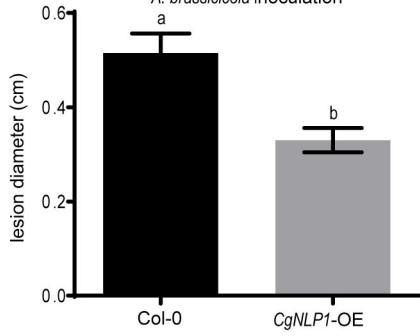

(a)

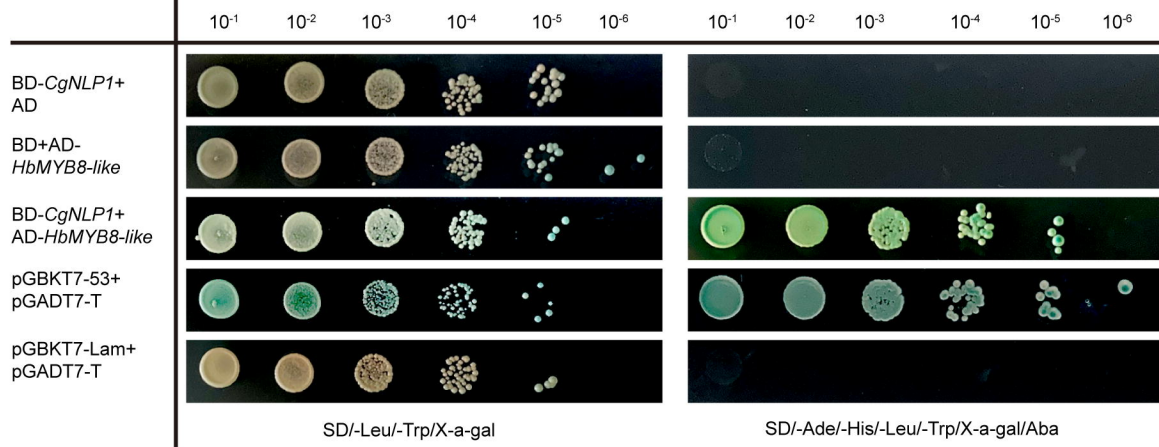

(b)

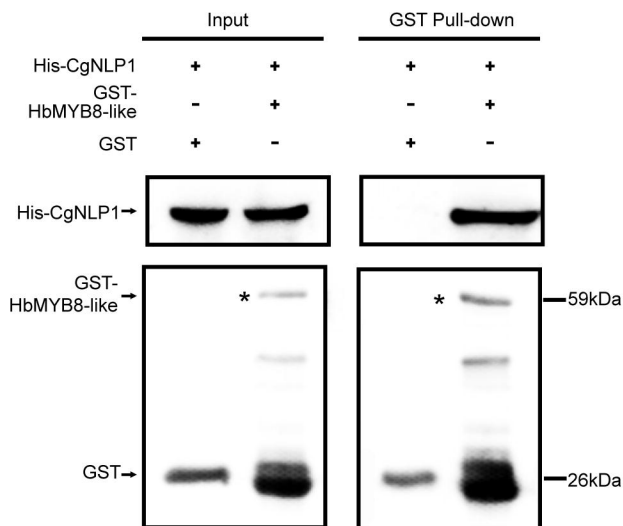

(c)

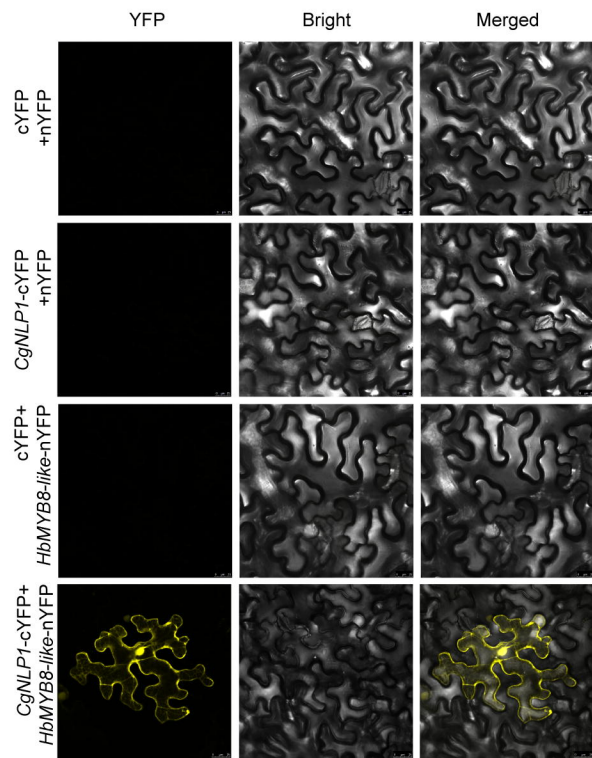

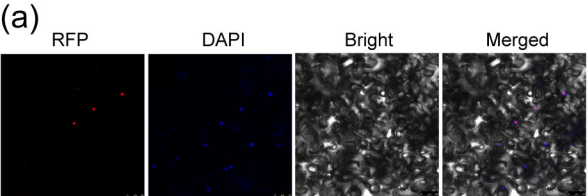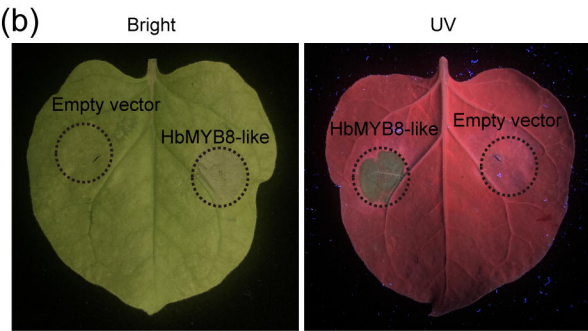

(a)

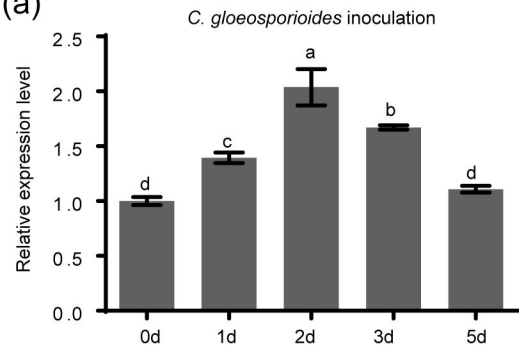

(b)

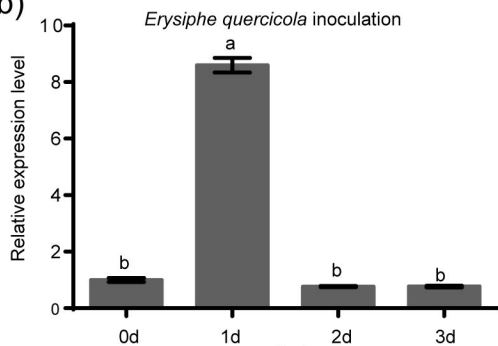

(c)

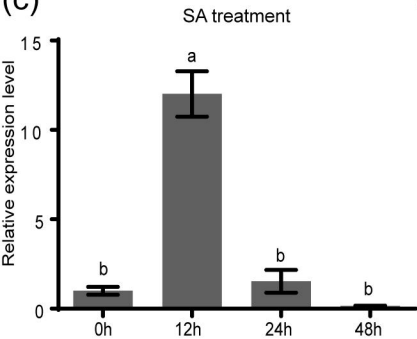

(d)

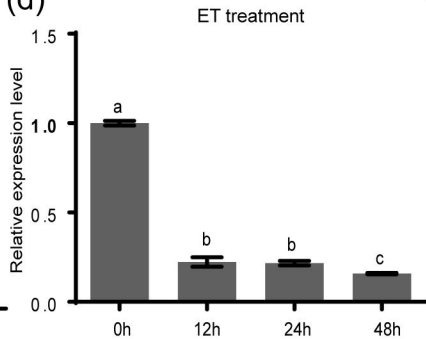

(e)

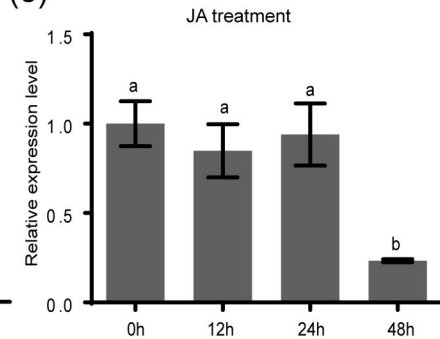

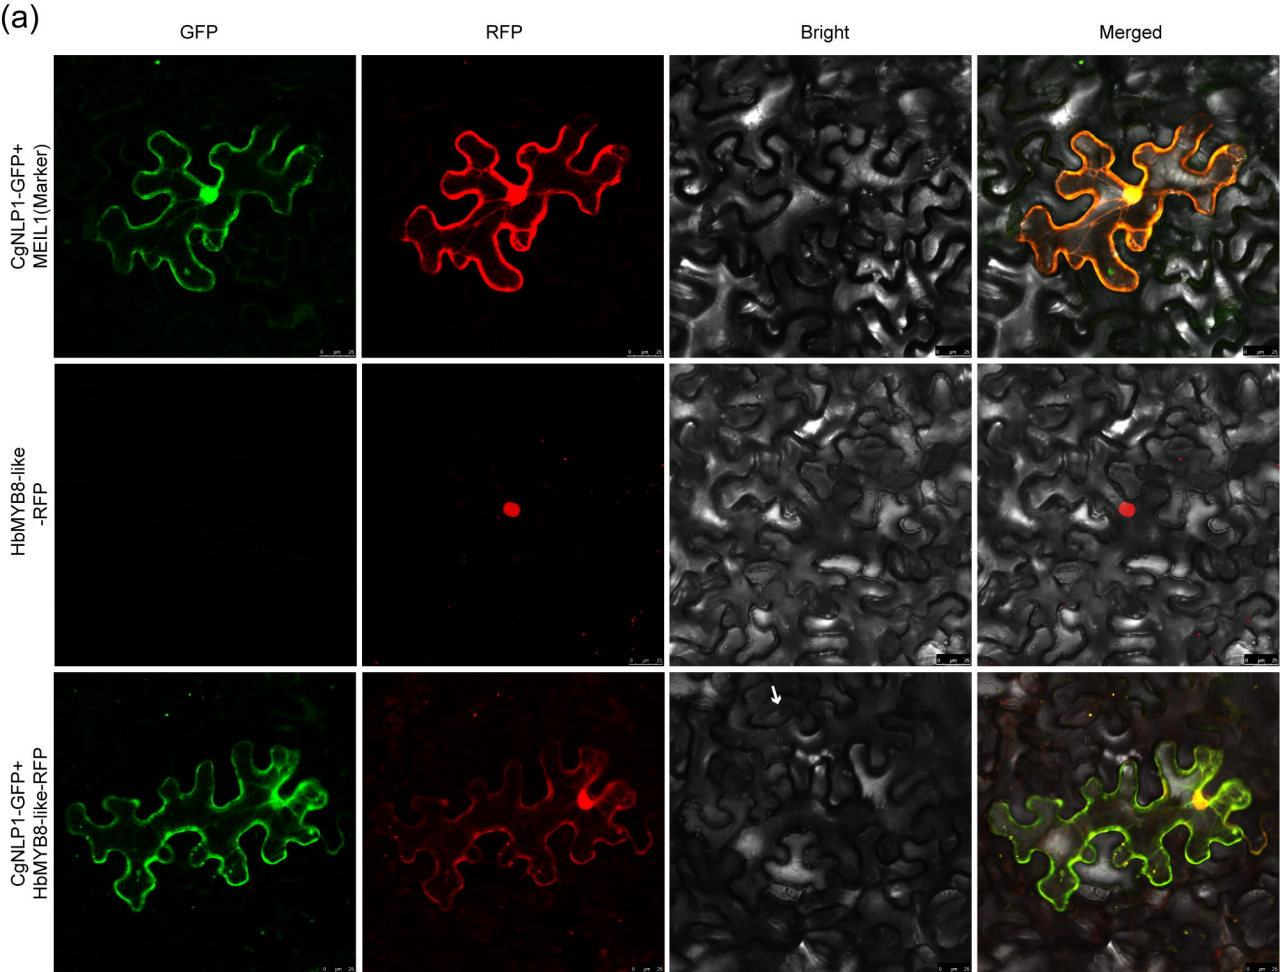

**(b)**

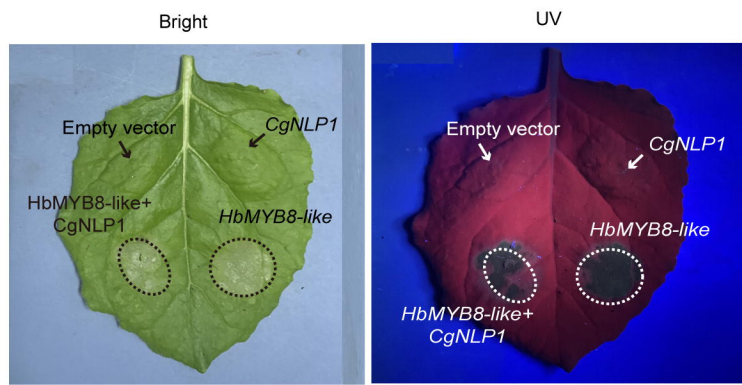

**(c)**

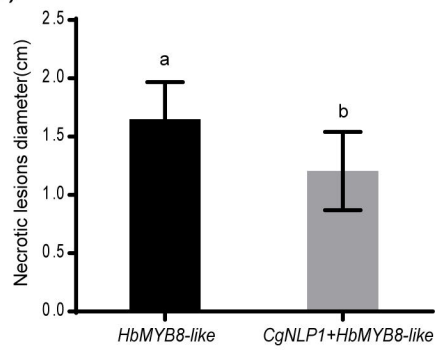

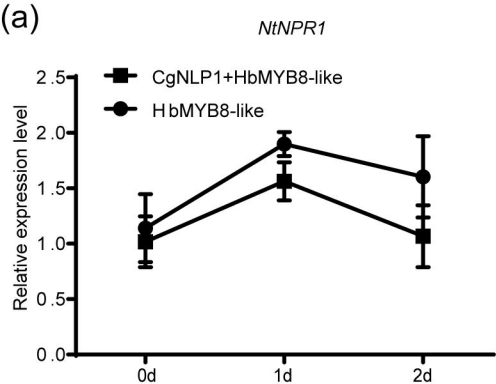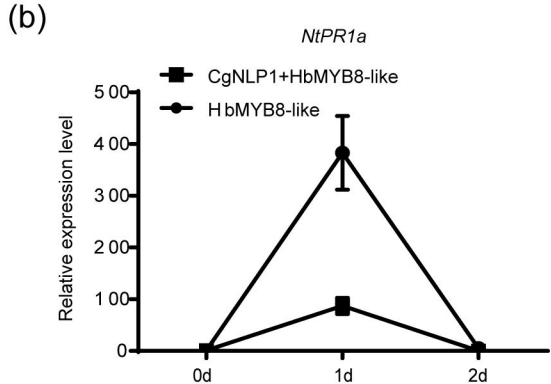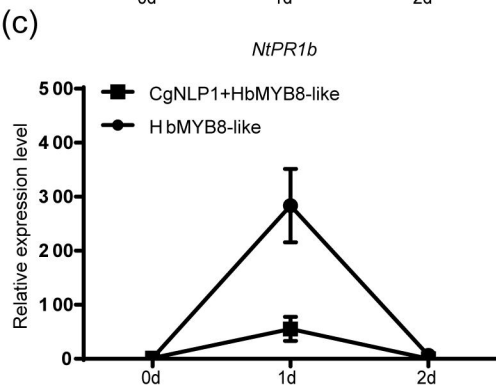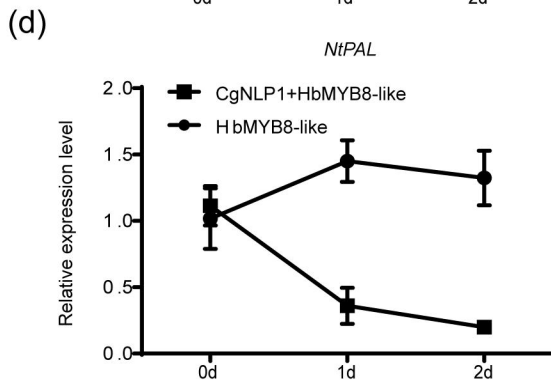

Source: https://www.biorxiv.org/content/10.1101/2022.01.23.477367v1.full.pdf
